# Supplementary material for: Building nanogapped graphene electrode arrays by electroburning
Source: Royal Society of Chemistry journal article supplement (doi:10.1039/c7ra13106b), 2018-01-01
Supplement: c7ra13106b1.pdf [file c7ra13106b1.pdf]

Electronic Supplementary Information

## **Building Nanogapped Graphene Electrode Arrays by Electroburning**

*By Chunhui Gu<sup>†</sup>, Dingkai Su<sup>†</sup>, Chuancheng Jia, Shizhao Ren, Xuefeng Guo\**

[\*] C. Gu, D. Su, Dr. C. Jia, S. Ren, Prof. Dr. X. Guo

Beijing National Laboratory for Molecular Sciences, State Key Laboratory for Structural Chemistry of Unstable and Stable Species, College of Chemistry and Molecular Engineering, Peking University, Beijing 100871, P. R. China.

Email: guoxf@pku.edu.cn

Prof. Dr. X. Guo

Department of Materials Science and Engineering, College of Engineering, Peking University, Beijing 100871, P. R. China.

<sup>†</sup>These authors contributed equally to the work.

## 1. Device fabrication

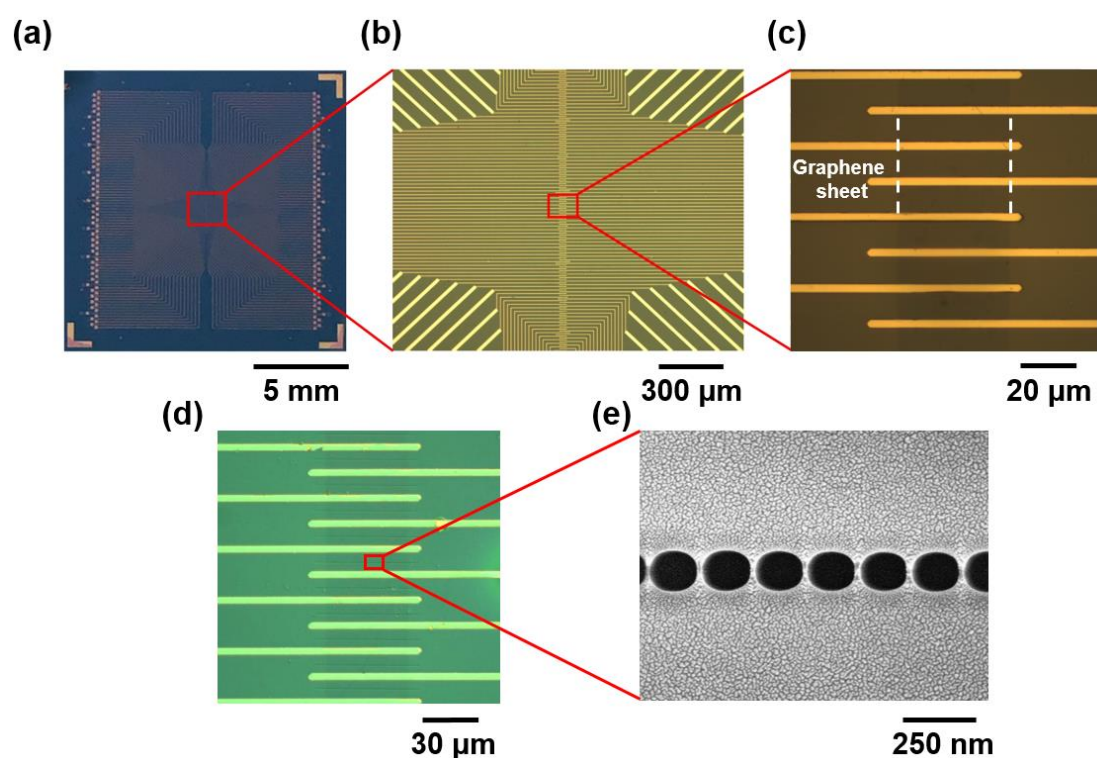

**Figure S1.** a-c) Optical images of a graphene device with different magnification. The yellow parts are metallic gold electrodes (Cr/Au: 8/60 nm), and the central part in (c) is graphene sheet (40 μm). d) Optical image of a graphene device coated by a PMMA layer after e-beam lithography. The center of each electrode pairs shows the exposed windows. e) SEM images of the exposed window arrays on PMMA resist (after gold spraying).

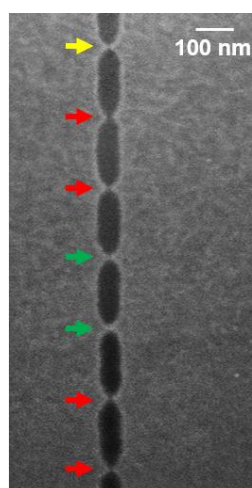

**Figure S2.** A typical SEM image of a graphene nanoconstriction array after oxygen RIE. The pattern units show inhomogeneity in some extent. The red, green and yellow arrows indicate for cracked units, uncracked units and units under the resolution, respectively.

## 2. Electrical measurement

The resistance of 40  $\mu\text{m}$  wide graphene sheets ( $R_{\text{ele}}$ ) and graphene nanoconstriction arrays ( $R_{\text{nano}}$ ) were derived from the current measurement under a bias voltage  $U = 50$  mV by an Agilent 4155C semiconductor characterization system (Figure S2a). Herein,  $R_{\text{ele}}$  equals  $U$  divided by the current before RIE.  $R_{\text{ele}} + R_{\text{nano}}$  equals  $U$  divided by the current after RIE.

**Table S1: The resistance of the typical graphene devices before and after RIE etching (Region 1)**

| Device number | Current before RIE ( $\mu\text{A}$ ) | Current after RIE ( $\mu\text{A}$ ) | $R_{\text{ele}}(\text{k}\Omega)$ | $R_{\text{ele}}+R_{\text{nano}}(\text{k}\Omega)$ | $R_{\text{nano}}(\text{k}\Omega)$ | $R_{\text{ele}}/R_{\text{nano}}$ |
|---------------|--------------------------------------|-------------------------------------|----------------------------------|--------------------------------------------------|-----------------------------------|----------------------------------|
| 1             | 8.25                                 | 5.02                                | 6.06                             | 9.96                                             | 3.90                              | 0.6                              |
| 2             | 8.03                                 | 1.20                                | 6.23                             | 41.67                                            | 35.44                             | 5.7                              |
| 3             | 12.8                                 | 4.85                                | 3.91                             | 10.31                                            | 6.40                              | 1.6                              |
| 4             | 15.1                                 | 6.78                                | 3.31                             | 7.37                                             | 4.06                              | 1.2                              |
| 5             | 18.6                                 | 9.88                                | 2.69                             | 5.06                                             | 2.37                              | 0.9                              |
| 6             | 7.33                                 | 4.28                                | 6.82                             | 11.68                                            | 4.86                              | 0.7                              |
| 7             | 5.31                                 | 1.68                                | 9.42                             | 29.76                                            | 20.35                             | 2.2                              |
| 8             | 5.32                                 | 1.53                                | 9.40                             | 32.68                                            | 23.28                             | 2.5                              |
| 9             | 4.38                                 | 0.92                                | 11.42                            | 54.35                                            | 42.93                             | 3.8                              |
| 10            | 6.45                                 | 1.80                                | 7.75                             | 27.78                                            | 20.03                             | 2.6                              |
| 11            | 13.2                                 | 1.06                                | 3.79                             | 47.17                                            | 43.38                             | 11.5                             |
| 12            | 13.7                                 | 3.90                                | 3.65                             | 12.82                                            | 9.17                              | 2.5                              |
| 13            | 15.4                                 | 1.12                                | 3.25                             | 44.64                                            | 41.40                             | 12.8                             |
| 14            | 12.1                                 | 5.04                                | 4.13                             | 9.92                                             | 5.79                              | 1.4                              |
| 15            | 6.34                                 | 1.64                                | 7.89                             | 30.49                                            | 22.60                             | 2.9                              |
| 16            | 8.64                                 | 3.72                                | 5.79                             | 13.44                                            | 7.65                              | 1.32                             |
| 17            | 8.15                                 | 1.28                                | 6.13                             | 39.06                                            | 32.93                             | 5.37                             |
| 18            | 8.9                                  | 3.22                                | 5.62                             | 15.53                                            | 9.91                              | 1.76                             |
| 19            | 8.5                                  | 0.94                                | 5.88                             | 53.19                                            | 47.31                             | 8.0                              |
| 20            | 4.94                                 | 1.80                                | 10.12                            | 27.78                                            | 17.66                             | 1.7                              |
| 21            | 6.81                                 | 0.88                                | 7.34                             | 56.82                                            | 49.48                             | 6.7                              |
| 22            | 19.4                                 | 2.00                                | 2.58                             | 25.00                                            | 22.42                             | 8.7                              |
| 23            | 18.1                                 | 3.28                                | 2.76                             | 15.24                                            | 12.48                             | 4.5                              |
| 24            | 7.22                                 | 1.29                                | 6.93                             | 38.76                                            | 31.83                             | 4.6                              |
| 25            | 9.9                                  | 2.55                                | 5.05                             | 19.61                                            | 14.56                             | 2.9                              |
| 26            | 4.41                                 | 2.17                                | 11.34                            | 23.04                                            | 11.70                             | 1.0                              |
| 27            | 12.2                                 | 4.52                                | 4.10                             | 11.06                                            | 6.96                              | 1.7                              |
| 28            | 4.86                                 | 2.79                                | 10.29                            | 17.92                                            | 7.63                              | 0.7                              |
| 29            | 5.85                                 | 2.27                                | 8.55                             | 22.03                                            | 13.48                             | 1.6                              |
| 30            | 7.2                                  | 4.26                                | 6.94                             | 11.74                                            | 4.79                              | 0.7                              |

**Table S2: The resistance of the typical graphene devices before and after RIE etching (Region 2)**

| Device number | Current before RIE ( $\mu\text{A}$ ) | Current after RIE ( $\mu\text{A}$ ) | $R_{\text{ele}}$ (k $\Omega$ ) | $R_{\text{ele}}+R_{\text{nano}}$ (k $\Omega$ ) | $R_{\text{nano}}$ (k $\Omega$ ) | $R_{\text{ele}}/R_{\text{nano}}$ |
|---------------|--------------------------------------|-------------------------------------|--------------------------------|------------------------------------------------|---------------------------------|----------------------------------|
| 1             | 13.4                                 | 0.064                               | 3.73                           | 781                                            | 778                             | 208.4                            |
| 2             | 14.7                                 | 0.02                                | 3.40                           | $2.50 \times 10^3$                             | $2.49 \times 10^3$              | 734.0                            |
| 3             | 15.6                                 | 0.50                                | 3.21                           | 100                                            | 97                              | 30.2                             |
| 4             | 5.05                                 | 0.04                                | 9.90                           | $1.25 \times 10^3$                             | $1.24 \times 10^3$              | 125.3                            |
| 5             | 5.32                                 | 0.27                                | 9.40                           | 185                                            | 176                             | 18.7                             |
| 6             | 4.49                                 | 0.10                                | 11.14                          | 500                                            | 489                             | 43.9                             |
| 7             | 6.6                                  | 0.02                                | 7.58                           | $2.50 \times 10^3$                             | $2.49 \times 10^3$              | 329.0                            |
| 8             | 9.12                                 | 0.045                               | 5.48                           | $1.11 \times 10^3$                             | $1.10 \times 10^3$              | 201.7                            |
| 9             | 8.07                                 | 0.13                                | 6.20                           | 385                                            | 378                             | 61.1                             |
| 10            | 8.83                                 | 0.067                               | 5.66                           | 746                                            | 741                             | 130.8                            |
| 11            | 8.48                                 | 0.016                               | 5.90                           | $3.13 \times 10^3$                             | $3.12 \times 10^3$              | 529.0                            |
| 12            | 8.04                                 | 0.385                               | 6.22                           | 130                                            | 124                             | 19.9                             |
| 13            | 6.95                                 | 0.32                                | 7.19                           | 156                                            | 149                             | 20.7                             |
| 14            | 7.94                                 | 0.14                                | 6.30                           | 357                                            | 351                             | 55.7                             |
| 15            | 6.87                                 | 0.10                                | 7.28                           | 500                                            | 493                             | 67.7                             |
| 16            | 6.42                                 | 0.068                               | 7.79                           | 735                                            | 728                             | 93.4                             |
| 17            | 5.73                                 | 0.12                                | 8.73                           | 417                                            | 408                             | 46.8                             |
| 18            | 5.72                                 | 0.57                                | 8.74                           | 88                                             | 79                              | 9.0                              |
| 19            | 7.11                                 | 0.30                                | 7.03                           | 167                                            | 160                             | 22.7                             |
| 20            | 5.26                                 | 0.003                               | 9.51                           | $1.67 \times 10^5$                             | $2.49 \times 10^5$              | 1752.3                           |
| 21            | 4.45                                 | 0.45                                | 11.24                          | 111                                            | 100                             | 8.9                              |
| 22            | 8.49                                 | 0.10                                | 5.89                           | 500                                            | 494                             | 83.9                             |
| 23            | 7.6                                  | 0.003                               | 6.58                           | $1.67 \times 10^5$                             | $2.49 \times 10^5$              | 2532.3                           |
| 24            | 7.24                                 | 0.045                               | 6.91                           | $1.11 \times 10^3$                             | $1.10 \times 10^3$              | 159.9                            |
| 25            | 5.77                                 | 0.005                               | 8.67                           | $1.00 \times 10^5$                             | $1.00 \times 10^5$              | 1153.0                           |
| 26            | 6.34                                 | 0.08                                | 7.89                           | 625                                            | 617                             | 78.3                             |
| 27            | 5.02                                 | 0.18                                | 9.96                           | 278                                            | 268                             | 26.9                             |
| 28            | 6.52                                 | 0.026                               | 7.67                           | $1.92 \times 10^3$                             | $1.91 \times 10^3$              | 249.8                            |
| 29            | 5.5                                  | 0.07                                | 9.09                           | 714                                            | 705                             | 77.6                             |
| 30            | 5.45                                 | 0.008                               | 9.17                           | $6.25 \times 10^3$                             | $6.24 \times 10^3$              | 680.3                            |
| 31            | 7.54                                 | 0.20                                | 6.63                           | 250                                            | 243                             | 36.7                             |
| 32            | 14.1                                 | 0.016                               | 3.55                           | $3.13 \times 10^3$                             | $3.12 \times 10^3$              | 880.3                            |
| 33            | 13                                   | 0.30                                | 3.85                           | 167                                            | 163                             | 42.3                             |
| 34            | 12.5                                 | 0.08                                | 4.00                           | 625                                            | 621                             | 155.3                            |
| 35            | 9.33                                 | 0.258                               | 5.36                           | 194                                            | 188                             | 35.2                             |

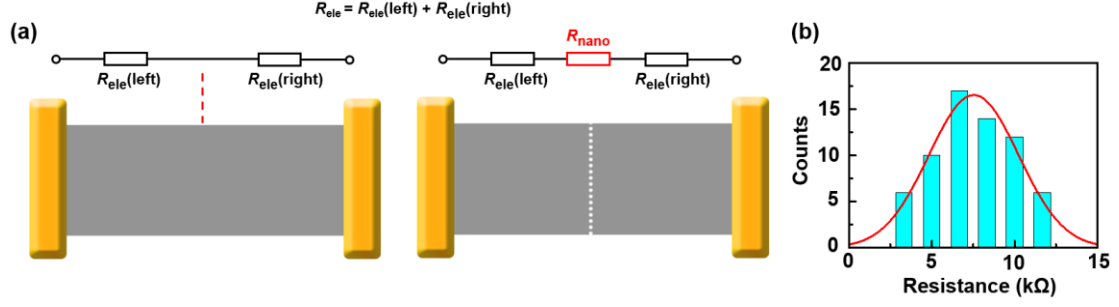

**Figure S3.** a) Schematic of the definition of  $R_{ele}$  and  $R_{nano}$ . b) Resistance distribution histogram of a 12  $\mu\text{m}$  long, 40  $\mu\text{m}$  wide graphene sheet. The resistance is fitted in  $7.53 \pm 2.42$  k $\Omega$ , from which the resistivity  $\rho$  of single-layer graphene we calculated is  $25.1 \pm 8.1$  k $\Omega$ .

### 3. The simulation based on a classical resistance model.

The relationship between the crack critical point ( $I$ ,  $U$ ) and the width of each graphene nanoconstriction unit ( $W_{unit}$ ) was calculated based on an ideal broadening model (Figure 1b in the main text). The simulation was carried out by a numerical calculation method according to the following equation set with a Matlab R2009a software.

$$\begin{aligned}
 Part(x) &= \frac{d_2 - 2 \times \sqrt{r^2 - x^2}}{d_1 + d_2} \\
 R_{nano} &= \int_{-r}^r \frac{(\rho/W_{chan})dx}{Part(x)} \\
 R_{ele} &= (\rho/W_{chan})(L_{chan} - 2r) \\
 I &= Jh(d_1 - 2r)n_{jun} \\
 U &= I(R_{nano} + R_{ele}) \\
 W_{unit} &= d_2 - 2r
 \end{aligned}$$

In the equation set,  $Part(x)$  represents the remaining proportion of graphene on a particular line vertical to the channel.  $d_1$  and  $d_2$  represent the length of alternating segments ( $d_1$ ) and spaces ( $d_2$ ) in the dash line pattern.  $r$  represents the broadening radius,  $\rho$  represents the 2D resistivity for graphene,  $W_{chan}$  and  $L_{chan}$  represent the width and length for the graphene channel.  $R_{nano}$  and  $R_{ele}$  represent the resistance of the nanoconstriction array and graphene electrodes.  $J$  represents the critical current intensity and  $h$  represents the thickness of single-layer graphene.

In the numerical calculation,  $r$  was set as an independent variable from 15 nm to 20 nm. The following parameters were derived from the device design:  $d_1 = 150$  nm,  $d_2 = 40$  nm,  $W_{\text{chan}} = 40$   $\mu\text{m}$ ,  $L_{\text{chan}} = 12$   $\mu\text{m}$ .  $\rho = 25.1 \pm 1.7$   $\text{k}\Omega$  was derived from the experimental results (Figure S2b).  $J = \sim 10^8$   $\text{A}/\text{cm}^2$  and  $Jh = \sim 1$   $\mu\text{A}/\text{nm}$  were derived from the results reported before.

Equations E2 and E3 were derived from the classical Ohm's law:  $I = U/R$ , where  $I$  represents the current,  $U$  represents the applied voltage and  $R$  represents the resistance of the circuit. In E2,  $R$  is composed of the resistance of graphene sheets ( $R_{\text{ele}}$ ) and graphene nanoconstriction arrays ( $R_{\text{nano}}$ ):  $R = R_{\text{ele}} + R_{\text{nano}}$  (see Figure S3).  $R_{\text{nano}}$  can be deemed as the resistance of graphene nanoconstriction arrays with  $n$ -paralleled units:  $R_{\text{nano}} = R_{\text{unit}}/n$ , where  $R_{\text{unit}}$  represents the resistance of each unit. In E3, the positive feedback ratio can be regarded as the normalized total differential:  $dI/I dn$ , evaluating how much proportion of the current ( $dI/I$ ) can be affected by the paralleled numbers ( $dn$ ).

#### 4. The $I$ - $V$ curves of the electroburning process

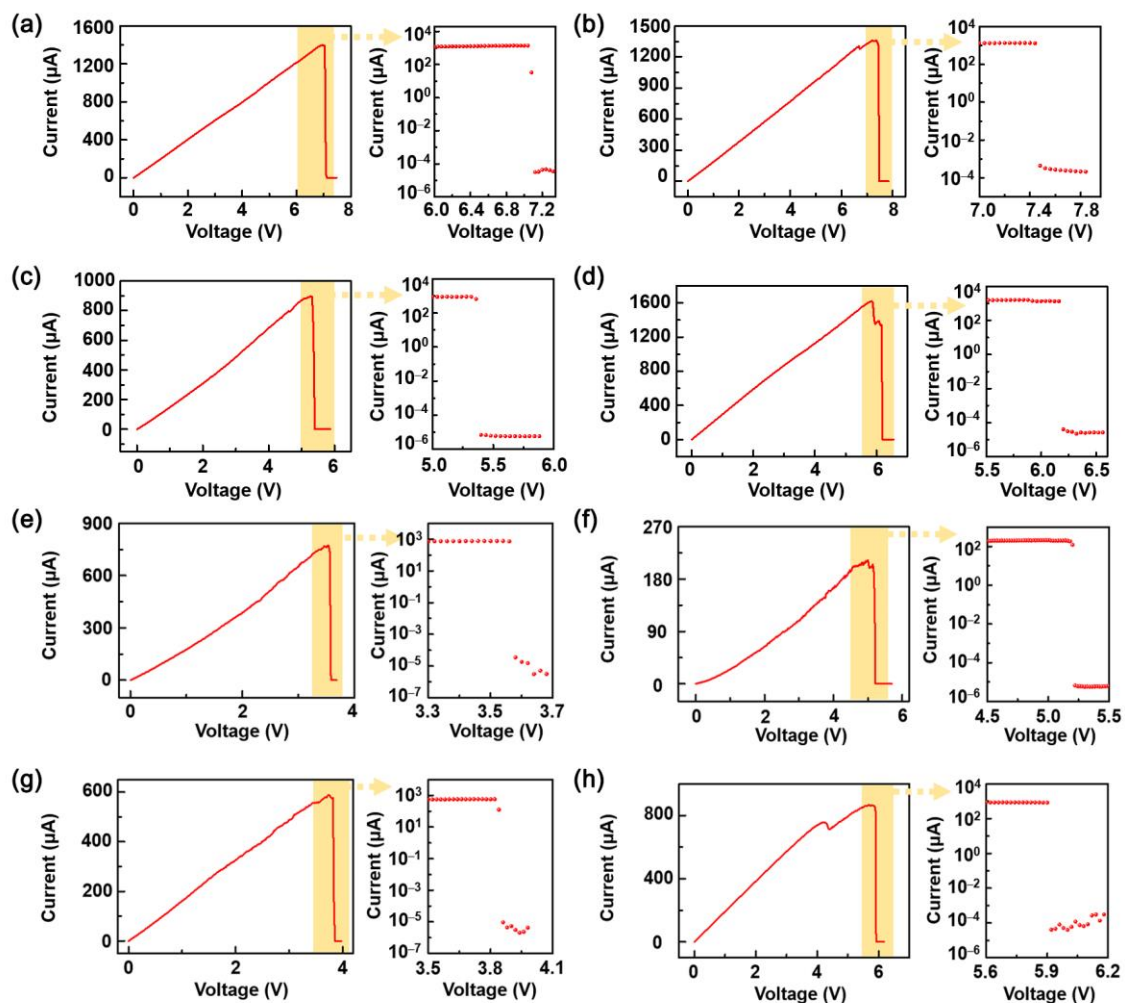

**Figure S4.** a-h) Representative  $I$ - $V$  characteristics of the electroburning process, where the crack critical points are located in Region 1. Right figures show the enlarged scales of the yellow area in a semi-logarithm axis.

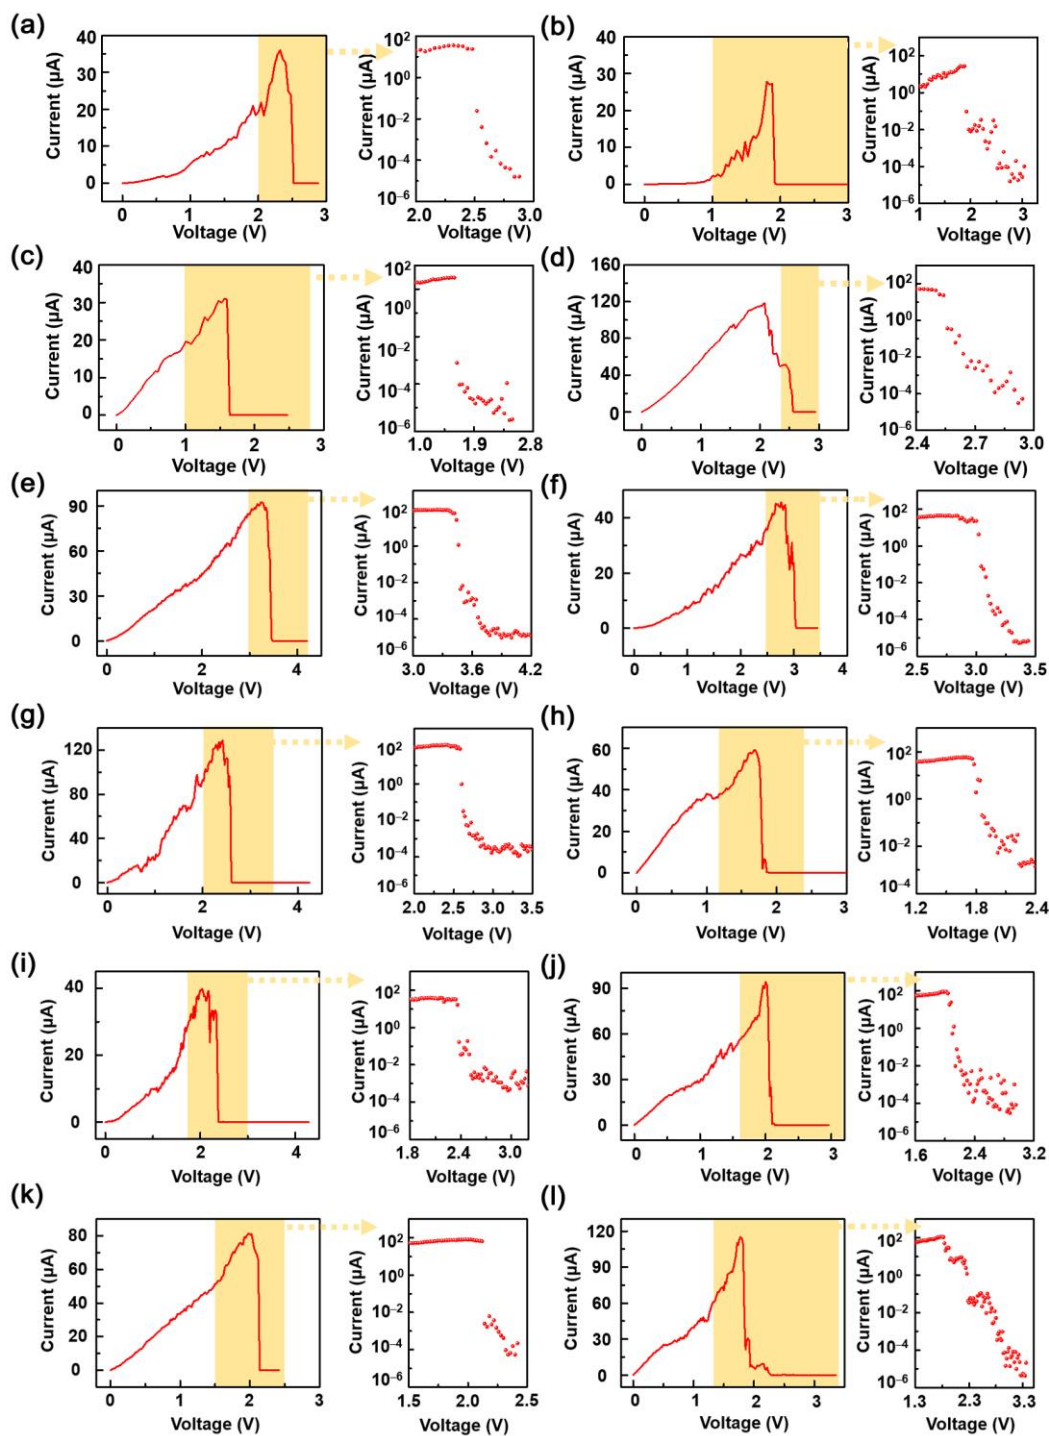

**Figure S5.** a-l) Representative  $I$ - $V$  characteristics of the electroburning process, where the crack critical points are located in Region 2. Right figures show the enlarged scales of the yellow area in a semi-logarithm axis.



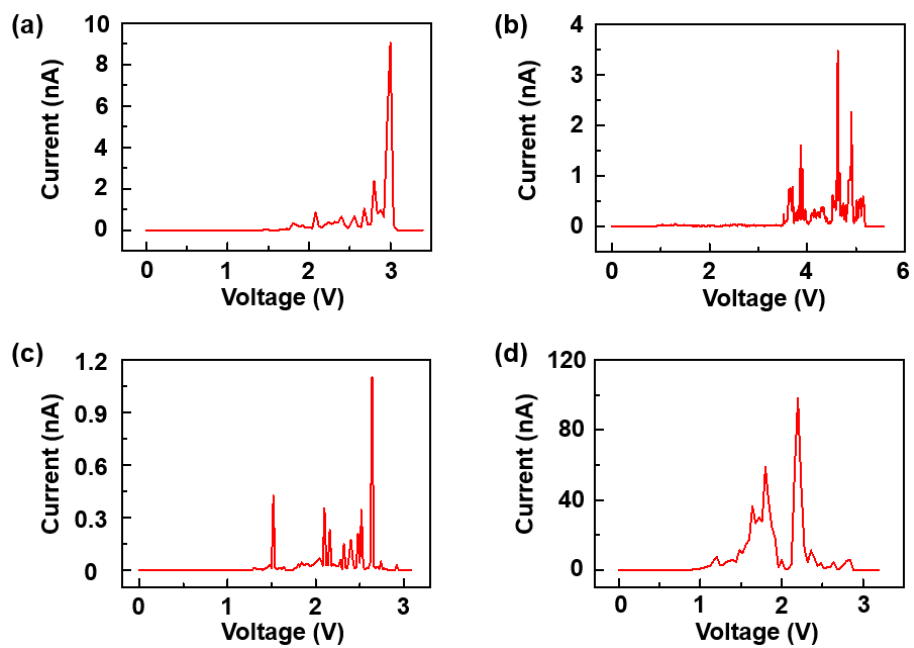

**Figure S6.** a-d) Representative  $I$ - $V$  characteristics of the devices after the electroburning process, where the crack critical points are located under Region 2.
